# Supplementary material for: Effects of Water Quality and Post-Harvest Handling on Microbiological Contamination of Lettuce at Urban and Peri-Urban Locations of Ouagadougou, Burkina Faso
Source: PubMed Central journal article supplement (PMC6306915; doi:10.3390/foods7120206), 2018-12-16
Supplement: foods-07-00206-s001.pdf [file foods-07-00206-s001.pdf]

## Supplementary material

**Table S1** Collected data and questions posed during individual interviews in a survey to evaluate post-harvest handling strategies from trading women and vegetable seller on markets and streets in Ouagadougou, Burkina Faso during 2013 and 2014.

| Collected data and posed questions                                                                                                             | Data type                         |
|------------------------------------------------------------------------------------------------------------------------------------------------|-----------------------------------|
| Which vegetables are often eaten raw (without cooking)?                                                                                        | Qualitative                       |
| Which of these vegetables do you sell?                                                                                                         | Qualitative                       |
| Which season of the year is the main sales period of these vegetables?                                                                         | Qualitative                       |
| What are your sources of supply?                                                                                                               | Categorical: farm, market, others |
| From which farm/market do you obtain the vegetables? (Information on exact location via GPS tracking)                                          | Qualitative (+ GPS coordinates)   |
| At which time and in which intervals do you obtain the vegetables from farm/market?                                                            | Qualitative/Integer               |
| Please describe the handling of the vegetables from the time of purchase on the farm/market and resale on the market. (Cutting, washing, etc.) | Qualitative                       |
| What's your sales location? (Name of the market, street, customer, etc.; Information on exact location via GPS tracking)                       | Qualitative (+ GPS coordinates)   |
| On which days of the week and to which time are you selling the produce?                                                                       | Integer/Categorical               |
| Does consumer/buyer ask for the exact location of the farm where the vegetables were cultivated?                                               | Binary, yes/no                    |
| Does consumer/buyer ask for the used irrigation practice on farm (wastewater usage)?                                                           | Binary, yes/no                    |
| In case of customer questions, how often are these questions asked?                                                                            | Integer                           |
| Are you willing that we accompany you for a few days on your sales tour from farm to market?                                                   | Binary, yes/no                    |

**Table S2** Results of monitoring the post-harvest handling of ten lettuce traders from harvest in urban and peri-urban gardens to their selling points in Ouagadougou, 2014.

| Irrigation water | Wash water source on farm | Prewash of roots   | Harvest ID | Harvest time | Begin of sale                                          | Location of sale                           | Type of lettuce cover                        | Washing practice                                                                                         | Transport by | Total distance (km) |
|------------------|---------------------------|--------------------|------------|--------------|--------------------------------------------------------|--------------------------------------------|----------------------------------------------|----------------------------------------------------------------------------------------------------------|--------------|---------------------|
| Well             | Well                      | Yes                | T7         | 7:00 AM      | 8:15 AM                                                | Official market                            | Old washed leaves and plastic sheet          | Washed small portion with used tap water                                                                 | Bicycle      | 3.75                |
|                  |                           | No                 | T3         | 8:00 AM      | 9:40 AM<br>↓ <i>Change selling location</i><br>5:00 PM | Official market<br>Informal market         | Jute sack or cloth                           | Washed small portion with used tap water and sprinkled with wash water, later washed all with used water | Motorbike    | 13.3                |
|                  |                           | Yes                | T4         | 10:30 AM     | 3:00 PM                                                | Informal market                            | Old washed leaves<br>Jute sack after washing | Wash all with tap water                                                                                  | Motorbike    | 16.5                |
|                  |                           | No                 | T9         | 9:30 AM      | 10:30 AM                                               | Official market                            | Washed plastic sheet                         | No post-harvest wash, just wetens with tap water                                                         | Motorbike    | 14.2                |
|                  |                           |                    | T2         | 8:00 AM      | 9:00 AM                                                | Markets & houses<br>↓ <i>Change trader</i> | Dry cloth                                    | No post-harvest wash                                                                                     | Motorbike    | 11.75               |
| Channel          | Well                      | No roots harvested | T10        | 6:30 AM      | 7:30 AM                                                | Official market                            | Old washed leaves and cloth                  | No post-harvest wash                                                                                     | Motorbike    | 1.7                 |
|                  |                           |                    |            |              | 5:00 PM                                                | Street shop                                | Not covered                                  | Wash with tap water at home and sprinkled with tap water                                                 | Bicycle      | 8.3                 |
|                  |                           | No                 | T5         | 8:00 AM      | 9:00 AM                                                | Official market                            | Well water wet cloth                         | No post-harvest wash                                                                                     | Motorbike    |                     |
|                  |                           |                    |            |              | 11:00 AM                                               | Official market                            | Plastic sheed                                | Washed two times with tap water                                                                          |              | 2.95                |
|                  |                           | Channel            | T6         | 3:00 PM      | 3:30 PM                                                | Street shop                                | Old washed leaves and jute sack              | No post-harvest wash                                                                                     | Bicycle      | 1.35                |
| Well             | Not washed                | Yes                | T8         | 3:00 PM      | 3:30 PM                                                | Street shop                                | Not covered                                  | Washed with well water                                                                                   | Walking      | 0.05                |
|                  |                           |                    | T1         | 8:00 AM      | 5:00 PM                                                | Street shop                                | Old washed leaves and wet cloth              | Washed at home with tap water                                                                            | Bicycle      | 1.47                |
